# Supplementary material for: Hierarchically Assembled Type I Collagen Fibres as Biomimetic Building Blocks of Biomedical Membranes
Source: MDPI journal article supplement (doi:10.3390/membranes11080620), 2021-08-12
Supplement: s1 [file s1]

# Hierarchically Assembled Type I Collagen Fibres as Biomimetic Building Blocks of Biomedical Membranes

Jie Yin <sup>1,2,†</sup>, David J. Wood <sup>2</sup>, Stephen J. Russell <sup>1</sup> and Giuseppe Tronci <sup>1,2,\*</sup>

<sup>1</sup> Clothworkers' Centre for Textile Materials Innovation for Healthcare, School of Design, University of Leeds, Leeds LS2 9JT, UK; jie.yin@henkel.com (J.Y.); s.j.russell@leeds.ac.uk (S.J.R.)

<sup>2</sup> Biomaterials and Tissue Engineering Research Group, School of Dentistry, St. James's University Hospital, University of Leeds, Leeds LS9 7TF, UK; d.j.wood@leeds.ac.uk

\* Correspondence: g.tronci@leeds.ac.uk

† Current address: Henkel (China) Investment Co., Ltd., Shanghai 201203, China.

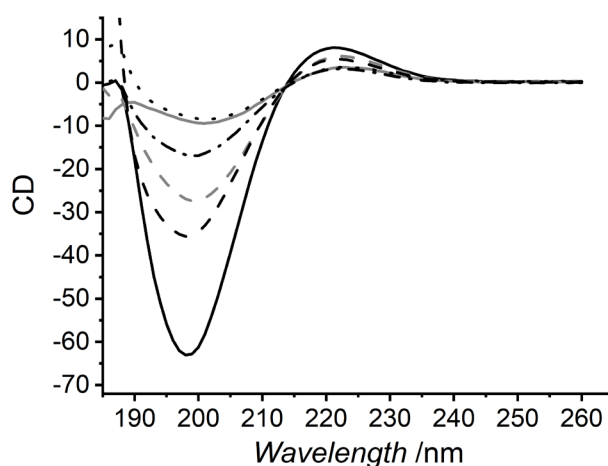

**Figure S1.** CD spectra of samples of CRT (—), 4VBC (---), GMA (···), 4VBC-MA (— · —), F-4VBC (— · — · —), F-GMA (---).

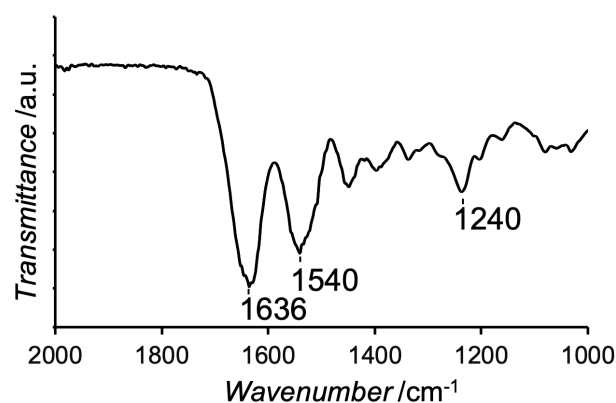

**Figure S2.** ATR-FTIR spectrum of wet spun functionalised collagen sample F-4VBC-MA.
